# Supplementary material
Source: bioRxiv or medRxiv preprint supplement (https://medrxiv.org/highwire/filestream/96237/field_highwire_adjunct_files/0/2020.09.09.20178764-1.pdf)
Supplement: Supplementary file [file 2020.09.09.20178764-1.pdf]

Supplementary Table 1: SARS-CoV-2 negative PUI

| Sample ID | Inpatient/<br>ED vs.<br>Outpatient | Molecular/Microbiology Testing | Virus Detected<br>by Molecular<br>Testing | Total mNGS Reads | Virus Detected by mNGS |
|-----------|------------------------------------|--------------------------------|-------------------------------------------|------------------|------------------------|
| Sample 1  | Inpatient                          | Flu/RSV PCR, RVP               |                                           | 70,762,923       | HCoV NL63              |
| Sample 2  | Inpatient                          | Flu/RSV PCR, Biofire           |                                           | 62,248,312       | HCoV NL63              |
| Sample 3  | Inpatient                          | Flu/RSV PCR, Biofire           |                                           | 75,737,372       |                        |
| Sample 4  | Inpatient                          | RVP                            | Influenza A (H1N1)                        | 86,157,207       | Influenza A            |
| Sample 5  | Inpatient                          | Flu/RSV PCR, Biofire           |                                           | 47,846,226       |                        |
| Sample 6  | Inpatient                          | Flu/RSV PCR, Biofire,          |                                           | 38,811,975       |                        |
| Sample 7  | Outpatient                         | Flu/RSV                        |                                           | 39,157,594       |                        |
| Sample 8  | Outpatient                         | Flu/RSV PCR, Biofire           |                                           | 135,713,444      | Alphacoronavirus       |
| Sample 9  | Outpatient                         | Flu/RSV PCR, Biofire           | HCoV OC43                                 | 3,804,643        | Betacoronavirus        |
| Sample 10 | Outpatient                         | Flu/RSV PCR, Biofire           |                                           | 18,280,635       |                        |
| Sample 11 | Outpatient                         | RVP, Biofire                   | Influenza A (H1N1)                        | 40,791,318       | Influenza A            |
| Sample 12 | Outpatient                         | None                           |                                           | 59,865,052       | Alphacoronavirus       |
| Sample 13 | Outpatient                         | Flu/RSV PCR                    |                                           | 31,823,533       |                        |
| Sample 14 | Outpatient                         | Flu/RSV PCR, Biofire           | Coronavirus HKU1                          | 45,061,784       | HCoV HKU1              |
| Sample 15 | Outpatient                         | Flu/RSV PCR, Biofire           |                                           | 44,320,874       |                        |
| Sample 16 | Inpatient                          | Flu/RSV PCR, RVP               |                                           | 52,161,878       |                        |
| Sample 17 | Inpatient                          | Flu/RSV PCR, Biofire           | Coronavirus OC43                          | 49,293,359       | Betacoronavirus        |
| Sample 18 | Inpatient                          | Flu/RSV PCR, Biofire           |                                           | 70,496,648       |                        |
| Sample 19 | Inpatient                          | Flu/RSV PCR                    |                                           | 61,932,940       | Human metapneumovirus  |
| Sample 20 | Inpatient                          | Flu/RSV PCR, Biofire           |                                           | 32,161,686       |                        |
| Sample 21 | Inpatient                          | None                           |                                           | 60,798,226       | Alphacoronavirus       |
| Sample 22 | Outpatient                         | Biofire                        |                                           | 50,395,647       |                        |
| Sample 23 | Outpatient                         | Biofire                        | nan Metapneumovi                          | 30,198,751       | Human metapneumonvirus |
| Sample 24 | Inpatient                          | Flu/RSV PCR, Biofire           | nan Metapneumovi                          | 44,522,207       | Human metapneumovirus  |
| Sample 25 | Outpatient                         | Flu/RSV PCR, RVP               | Influenza A                               | 42,442,015       | Influenza A            |
| Sample 26 | Inpatient                          | Flu/RSV PCR, Biofire           |                                           | 37,368,507       |                        |
| Sample 27 | Inpatient                          | Flu/RSV PCR, Biofire           |                                           | 15,966,770       |                        |
| Sample 28 | Inpatient                          | Flu/RSV PCR, Biofire           |                                           | 75,192,839       |                        |
| Sample 29 | Outpatient                         | Biofire                        |                                           | 42,838,993       | RSV<br>Influenza A     |
| Sample 30 | Inpatient                          | Flu/RSV PCR, Biofire           |                                           | 41,924,438       |                        |

Supplementary Table 1: SARS-CoV-2 negative PUI

| <b>Sample ID</b> | <b>Virus Reads per Million (RPM)</b> | <b>Genome coverage</b> | <b>Confirmed</b> |
|------------------|--------------------------------------|------------------------|------------------|
| Sample 1         | 627                                  | 98%                    | Y                |
| Sample 2         | 0.02                                 | 1 genome region        | N                |
| Sample 3         |                                      |                        |                  |
| Sample 4         | 9829                                 | 100%                   | Y                |
| Sample 5         |                                      |                        |                  |
| Sample 6         |                                      |                        |                  |
| Sample 7         |                                      |                        |                  |
| Sample 8         | 0.4                                  | 0 genome regions       | N                |
| Sample 9         | 143                                  | least 6 genome regio   | Y                |
| Sample 10        |                                      |                        |                  |
| Sample 11        | 57                                   | 59%                    | Y                |
| Sample 12        | 0.8                                  | 0 genome regions       | N                |
| Sample 13        |                                      |                        |                  |
| Sample 14        | 2580                                 | 99%                    | Y                |
| Sample 15        |                                      |                        |                  |
| Sample 16        |                                      |                        |                  |
| Sample 17        | 4                                    | least 6 genome regio   | Y                |
| Sample 18        |                                      |                        |                  |
| Sample 19        | 34                                   | least 6 genome regio   | Y                |
| Sample 20        |                                      |                        |                  |
| Sample 21        | 0.6                                  | 0 genome regions       | N                |
| Sample 22        |                                      |                        |                  |
| Sample 23        | 8                                    | least 6 genome regio   | Y                |
| Sample 24        | 14                                   | least 6 genome regio   | Y                |
| Sample 25        | 0.09                                 | 4 genome regions       | Y                |
| Sample 26        |                                      |                        |                  |
| Sample 27        |                                      |                        |                  |
| Sample 28        |                                      |                        |                  |
| Sample 29        | 16,290                               | 61%                    | Y                |
|                  | 0.16                                 | least 6 genome regio   | Y                |
| Sample 30        |                                      |                        |                  |

Supplementary Table 2: SARS-CoV-2 positive PUI

| <b>Sample ID</b> | <b>Inpatient/ED vs. Outpatient</b> | <b>Molecular/Microbiology Testing</b> | <b>Co-infection Detected by</b> | <b>Total mNGS Reads</b> |
|------------------|------------------------------------|---------------------------------------|---------------------------------|-------------------------|
| Sample 1         | Inpatient                          | Flu/RSV PCR, RVP, Biofire             | None                            | 28,469,430              |
| Sample 2         | Inpatient                          | Flu/RSV PCR, Biofire                  | None                            | 1,815,609               |
| Sample 3         | Inpatient                          | RVP, Biofire                          | None                            | 83,251,868              |
| Sample 4         | Inpatient                          | Flu/RSV PCR, RVP, Biofire             | None                            | 40,616,205              |
| Sample 5         | Outpatient                         | None                                  | None                            | 420,981                 |
| Sample 6         | Inpatient                          | Flu/RSV PCR, Biofire                  | None                            | 2,021,152               |
| Sample 7         | Outpatient                         | Flu/RSV PCR, Biofire                  | None                            | 2,064,207               |
| Sample 8         | Inpatient                          | Flu/RSV PCR, RVP, Biofire             | None                            | 838,582                 |
| Sample 9         | Inpatient                          | Flu/RSV PCR, Biofire                  | None                            | 45,574,644              |
| Sample 10        | Inpatient                          | Flu/RSV PCR, Biofire                  | None                            | 57,601,938              |
| Sample 11        | Inpatient                          | Biofire (pnuemonia panel)             | None                            | 48,905,186              |
| Sample 12        | Inpatient                          | Flu/RSV PCR, RVP, Biofire,            | None                            | 1,586,965               |
| Sample 13        | Outpatient                         | None                                  | None                            | 464,554                 |
| Sample 14        | Outpatient                         | None                                  | None                            | 1,624,907               |
| Sample 15        | Inpatient                          | Flu/RSV PCR                           | None                            | 3,982,835               |
| Sample 16        | Outpatient                         | None                                  | None                            | 1,654,421               |
| Sample 17        | Outpatient                         | None                                  | None                            | 515,341                 |
| Sample 18        | Outpatient                         | None                                  | None                            | 419,118                 |
| Sample 19        | Outpatient                         | None                                  | None                            | 1,927,575               |
| Sample 20        | Outpatient                         | None                                  | None                            | 382,265                 |
| Sample 21        | Inpatient                          | Biofire (Pnuemonia panel)             | None                            | 378,556                 |
| Sample 22        | Inpatient                          | Flu/RSV PCR                           | None                            | 41,362,550              |
| Sample 23        | Inpatient                          | Flu/RSV PCR                           | None                            | 24,041,304              |
| Sample 24        | Inpatient                          | Flu/RSV PCR, RVP                      | None                            | 24,797,198              |
| Sample 25        | Inpatient                          | None                                  | None                            | 108,569,539             |
| Sample 26        | Inpatient                          | Flu/RSV PCR, Biofire                  | None                            | 22,341,214              |
| Sample 27        | Inpatient                          | Flu/RSV PCR                           | None                            | 35,062,760              |
| Sample 28        | Inpatient                          | None                                  | None                            | 31,598,437              |
| Sample 29        | Inpatient                          | Flu/RSV PCR, Biofire                  | None                            | 27,921,198              |
| Sample 30        | Inpatient                          | None                                  | None                            | 24,747,845              |
| Sample 31        | Inpatient                          | Flu/RSV PCR                           | None                            | 25,143,479              |

Supplementary Table 2: SARS-CoV-2 positive PUI

| Sample ID | Co-Infection Detected by mNGS | Virus Reads per Million (RPM) | % Genome coverage | Confirmed |
|-----------|-------------------------------|-------------------------------|-------------------|-----------|
| Sample 1  | None                          |                               |                   |           |
| Sample 2  | None                          |                               |                   |           |
| Sample 3  | None                          |                               |                   |           |
| Sample 4  | None                          |                               |                   |           |
| Sample 5  | None                          |                               |                   |           |
| Sample 6  | None                          |                               |                   |           |
| Sample 7  | None                          |                               |                   |           |
| Sample 8  | None                          |                               |                   |           |
| Sample 9  | None                          |                               |                   |           |
| Sample 10 | None                          |                               |                   |           |
| Sample 11 | None                          |                               |                   |           |
| Sample 12 | None                          |                               |                   |           |
| Sample 13 | None                          |                               |                   |           |
| Sample 14 | None                          |                               |                   |           |
| Sample 15 | None                          |                               |                   |           |
| Sample 16 | None                          |                               |                   |           |
| Sample 17 | None                          |                               |                   |           |
| Sample 18 | None                          |                               |                   |           |
| Sample 19 | None                          |                               |                   |           |
| Sample 20 | None                          |                               |                   |           |
| Sample 21 | None                          |                               |                   |           |
| Sample 22 | None                          |                               |                   |           |
| Sample 23 | None                          |                               |                   |           |
| Sample 24 | None                          |                               |                   |           |
| Sample 25 | RSV                           | 0.9                           | 3 genome regions  | Y         |
| Sample 26 | None                          |                               |                   |           |
| Sample 27 | None                          |                               |                   |           |
| Sample 28 | None                          |                               |                   |           |
| Sample 29 | None                          |                               |                   |           |
| Sample 30 | None                          |                               |                   |           |
| Sample 31 | None                          |                               |                   |           |

Supplementary Table 2: SARS-CoV-2 positive PUI

| <b>Sample ID</b> | <b>Inpatient/ED vs. Outpatient</b> | <b>Molecular/Microbiology Testing</b> | <b>Co-infection Detected by</b> | <b>Total mNGS Reads</b> |
|------------------|------------------------------------|---------------------------------------|---------------------------------|-------------------------|
| Sample 32        | Inpatient                          | None                                  | None                            | 32,914,438              |
| Sample 33        | Inpatient                          | Flu/RSV PCR, Biofire                  | None                            | 21,555,335              |
| Sample 34        | Inpatient                          | Flu/RSV PCR, Biofire                  | None                            | 26,458,326              |
| Sample 35        | Inpatient                          | Flu/RSV PCR, Biofire                  | None                            | 31,970,680              |
| Sample 36        | Inpatient                          | None                                  | None                            | 59,818,725              |
| Sample 37        | Inpatient                          | Biofire                               | None                            | 71,252,821              |
| Sample 38        | Inpatient                          | Flu/RSV PCR                           | None                            | 37,807,078              |
| Sample 39        | Inpatient                          | None                                  | None                            | 60,780,397              |
| Sample 40        | Inpatient                          | Flu/RSV PCR                           | None                            | 42,382,383              |
| Sample 41        | Outpatient                         | None                                  | None                            | 26,377,907              |
| Sample 42        | Inpatient                          | Flu/RSV PCR                           | None                            | 7,331,914               |
| Sample 43        | Inpatient                          | Flu/RSV PCR                           | None                            | 11,346,840              |
| Sample 44        | Inpatient                          | Flu/RSV PCR                           | None                            | 37,702,425              |
| Sample 45        | Inpatient                          | Flu/RSV PCR                           | None                            | 61,204,786              |

Supplementary Table 2: SARS-CoV-2 positive PUI

| <b>Sample ID</b> | <b>Co-Infection Detected by mNGS</b> | <b>Virus Reads per Million<br/>(RPM)</b> | <b>% Genome coverage</b> | <b>Confirmed</b> |
|------------------|--------------------------------------|------------------------------------------|--------------------------|------------------|
| Sample 32        | None                                 |                                          |                          |                  |
| Sample 33        | None                                 |                                          |                          |                  |
| Sample 34        | None                                 |                                          |                          |                  |
| Sample 35        | None                                 |                                          |                          |                  |
| Sample 36        | None                                 |                                          |                          |                  |
| Sample 37        | None                                 |                                          |                          |                  |
| Sample 38        | None                                 |                                          |                          |                  |
| Sample 39        | None                                 |                                          |                          |                  |
| Sample 40        | None                                 |                                          |                          |                  |
| Sample 41        | None                                 |                                          |                          |                  |
| Sample 42        | None                                 |                                          |                          |                  |
| Sample 43        | None                                 |                                          |                          |                  |
| Sample 44        | None                                 |                                          |                          |                  |
| Sample 45        | None                                 |                                          |                          |                  |
